# Supplementary material for: Microbial Ecology of Artisanal Feta and Kefalograviera Cheeses, Part I: Bacterial Community and Its Functional Characteristics with Focus on Lactic Acid Bacteria as Determined by Culture-Dependent Methods and Phenotype Microarrays
Source: MDPI journal article supplement (doi:10.3390/microorganisms10010161), 2022-01-13
Supplement: s1 [file s1]

**Table S1.** Biochemical properties used to identify the bacterial isolates.

| Group number | Isolate number                                                                                                   | Cell morphology <sup>a</sup> | CO <sub>2</sub> from glucose | Growth (%NaCl) |     | Growth (°C)        |    | Acid from |          |         |         |           |          |           |        |            |           |        |           |             |
|--------------|------------------------------------------------------------------------------------------------------------------|------------------------------|------------------------------|----------------|-----|--------------------|----|-----------|----------|---------|---------|-----------|----------|-----------|--------|------------|-----------|--------|-----------|-------------|
|              |                                                                                                                  |                              |                              | 4              | 6.5 | 10/15 <sup>b</sup> | 45 | lactose   | mannitol | sucrose | maltose | galactose | sorbitol | raffinose | ribose | cellobiose | trehalose | xylose | melibiose | L-arabinose |
| 1            | 2575, 2577, 2578, 2579, 2580, 2581, 2585, 2586, 2588, 2593, 2594, 2595, 2598, 2599, 2667, 2669, 2670, 2671, 2672 | c                            | -                            | +              | +   | +                  | +  | +         | +        | +       | +       | +         | +        | +         | +      | +          | +         | -      | -         | +           |
| 2            | 2582, 2583, 2587, 2592, 2600, 2601, 2603                                                                         | c                            | -                            | +              | +   | +                  | +  | +         | +        | +       | +       | +         | +        | +         | +      | +          | +         | -      | +         | +           |
| 3            | 2591                                                                                                             | c                            | -                            | +              | +   | +                  | +  | +         | +        | +       | +       | +         | +        | +         | +      | +          | +         | +      | +         | +           |
| 4            | 2597, 2711, 2710, 2717, 2718, 2720, 2721, 2723                                                                   | c                            | -                            | +              | +   | +                  | -  | +         | +        | +       | +       | +         | +        | +         | +      | +          | +         | -      | -         | +           |
| 5            | 2636, 2642, 2643, 2644, 2647, 2690, 2691                                                                         | c                            | -                            | +              | +   | +                  | -  | +         | +        | +       | +       | +         | +        | +         | +      | +          | +         | -      | +         | +           |
| 6            | 2686                                                                                                             | c                            | -                            | +              | +   | +                  | -  | +         | +        | +       | +       | +         | +        | +         | +      | +          | +         | +      | +         | +           |
| 7            | 2724, 2725,                                                                                                      | c                            | -                            | +              | +   | +                  | -  | +         | +        | +       | +       | +         | -        | +         | +      | +          | +         | -      | +         | +           |
| 8            | 2758                                                                                                             | c                            | -                            | +              | +   | +                  | -  | +         | +        | -       | +       | +         | +        | +         | +      | +          | +         | +      | +         | +           |
| 9            | 2602, 2651, 2722                                                                                                 | c                            | -                            | +              | +   | +                  | +  | +         | +        | +       | +       | +         | +        | -         | +      | +          | +         | -      | -         | -           |
| 10           | 2649, 2658, 2692, 2697, 2698, 2699, 2700                                                                         | c                            | -                            | +              | -   | +                  | -  | +         | -        | -       | +       | +         | -        | -         | +      | -          | -         | -      | -         | -           |
| 11           | 2616, 2681, 2683, 2689, 2694, 2753                                                                               | c                            | -                            | -              | -   | -                  | -  | +         | -        | +       | +       | +         | -        | +         | +      | +          | +         | -      | +         | -           |
| 12           | 2620, 2621, 2622, 2623, 2634, 2635, 2652, 2655, 2657, 2680, 2696, 2761                                           | c                            | -                            | -              | -   | -                  | -  | +         | -        | +       | +       | +         | -        | +         | +      | +          | +         | +      | +         | -           |
| 13           | 2673, 2674                                                                                                       | c                            | -                            | -              | -   | -                  | -  | +         | -        | +       | +       | +         | -        | -         | +      | +          | +         | +      | +         | -           |

|    |                                                                                                                                                            |   |   |   |   |   |   |   |   |   |   |   |   |   |   |   |   |   |   |   |
|----|------------------------------------------------------------------------------------------------------------------------------------------------------------|---|---|---|---|---|---|---|---|---|---|---|---|---|---|---|---|---|---|---|
| 14 | 2675, 2678, 2679                                                                                                                                           | c | - | - | - | - | - | + | - | + | + | + | - | - | + | + | + | + | - | - |
| 15 | 2676                                                                                                                                                       | c | - | - | - | - | - | + | - | + | + | + | - | + | + | + | + | + | - | - |
| 16 | 2677                                                                                                                                                       | c | - | - | - | - | - | + | - | + | + | + | - | + | + | + | + | - | - | - |
| 17 | 2748, 2749                                                                                                                                                 | c | - | - | - | - | - | + | - | + | + | + | - | - | + | + | + | - | + | - |
| 18 | 2754                                                                                                                                                       | c | - | - | - | - | - | + | - | + | + | + | - | - | + | + | + | - | - | - |
| 19 | 2752                                                                                                                                                       | c | - | - | - | - | - | + | - | - | + | + | - | - | + | + | + | + | - | - |
| 20 | 2576                                                                                                                                                       | c | + | - | - | - | - | + | + | + | + | + | - | + | - | + | + | - | + | - |
| 21 | 2604                                                                                                                                                       | c | + | - | - | - | - | + | + | + | + | + | - | - | - | + | + | - | + | - |
| 22 | 2703, 2706                                                                                                                                                 | c | + | - | - | - | - | + | + | + | + | + | - | + | + | + | + | + | + | - |
| 23 | 2704, 2705                                                                                                                                                 | c | + | - | - | - | - | + | + | + | + | + | - | + | + | + | + | - | + | - |
| 24 | 2662, 2693                                                                                                                                                 | b | + | - | - | + | - | - | + | + | - | - | - | + | + | + | - | + | + | - |
| 25 | 2708, 2709, 2716, 2728, 2734, 2735                                                                                                                         | b | + | - | - | + | - | - | - | + | - | - | - | - | + | + | - | - | - | - |
| 26 | 2584, 2605, 2606, 2607, 2608, 2609, 2610, 2639, 2640, 2641, 2653, 2654, 2668                                                                               | b | + | - | - | + | - | - | + | + | - | - | + | + | + | + | - | + | + | - |
| 27 | 2589, 2590, 2611, 2612, 2614, 2615, 2617, 2618, 2619, 2637, 2638, 2645, 2646, 2648, 2650, 2656                                                             | b | + | - | - | + | - | - | + | + | - | - | + | + | + | + | - | - | + | - |
| 28 | 2596, 2597, 2624, 2625, 2626, 2627, 2628, 2629, 2630, 2631, 2632, 2633, 2659, 2660, 2661, 2663, 2664, 2665, 2666, 2682, 2684, 2757, 2759, 2760, 2762, 2763 | b | + | - | - | + | - | - | - | + | + | + | - | + | + | - | - | + | + | - |
| 29 | 2685, 2687, 2688                                                                                                                                           | b | + | - | - | + | - | - | - | + | + | - | - | + | + | - | - | + | + | - |
| 30 | 2613, 2701, 2702, 2707, 2710, 2714, 2726, 2739, 2740, 2741, 2742, 2743, 2744, 2745, 2746                                                                   | b | + | - | - | - | - | - | - | + | + | + | - | + | - | + | + | + | + | - |
| 31 | 2712, 2713, 2719, 2747, 2750                                                                                                                               | b | + | - | - | - | - | - | - | + | + | + | - | + | - | + | + | - | + | - |
| 32 | 2727, 2729, 2730, 2731                                                                                                                                     | b | + | - | - | - | - | - | - | + | + | + | - | + | - | - | + | + | + | - |
| 33 | 2732                                                                                                                                                       | b | + | - | - | - | - | - | - | + | + | + | - | + | - | - | + | - | + | - |
| 34 | 2733, 2756                                                                                                                                                 | b | + | - | - | - | - | - | - | + | + | + | - | - | - | - | + | - | + | - |
| 35 | 2736, 2737, 2738                                                                                                                                           | b | + | - | - | - | - | - | - | + | + | + | - | - | - | - | + | + | + | - |

|    |            |   |   |   |   |   |   |   |   |   |   |   |   |   |   |   |   |   |   |   |
|----|------------|---|---|---|---|---|---|---|---|---|---|---|---|---|---|---|---|---|---|---|
| 36 | 2751, 2755 | b | + | - | - | - | - | - | - | + | + | + | - | - | - | + | + | - | + | - |
|----|------------|---|---|---|---|---|---|---|---|---|---|---|---|---|---|---|---|---|---|---|

<sup>a</sup> b: bacilli; c: cocci

<sup>b</sup> 10°C for cocci; 15°C for bacilli
